# Supplementary material for: Highly sensitive and accurate detection of cholesterol based on a single red upconversion biosensor
Source: Royal Society of Chemistry journal article supplement (doi:10.1039/d3ra07354h), 2024-01-01
Supplement: d3ra07354h1.pdf [file d3ra07354h1.pdf]

1  
2  
3  
4  
5  
6  
7  
8  
9  
10  
11  
12  
13  
14  
15  
16  
17  
18  
19  
20  
21  
22

**Supporting Information**

**Highly sensitive and accurate detection of cholesterol based on single red  
upconversion biosensor**

Pang Tingyuan<sup>1</sup>, Liu Xiaorui<sup>1</sup>, Li Jia<sup>1</sup>, Song qi<sup>1</sup>, Li Junren<sup>1</sup>, Han Ling<sup>2</sup>, Shu Wenying<sup>1</sup>,  
Jian Xiaoshun<sup>1</sup>, Zhang Meimei<sup>1\*</sup>

<sup>1</sup>Department of Pharmacy, Affiliated Cancer Hospital & Institute of Guangzhou  
Medical University, Guangzhou, China

<sup>2</sup>Integrated Traditional Chinese and Western Medicine Department (Internal Medicine  
Section 5), Affiliated Cancer Hospital & Institute of Guangzhou Medical University,  
Guangzhou, China

23

24

25

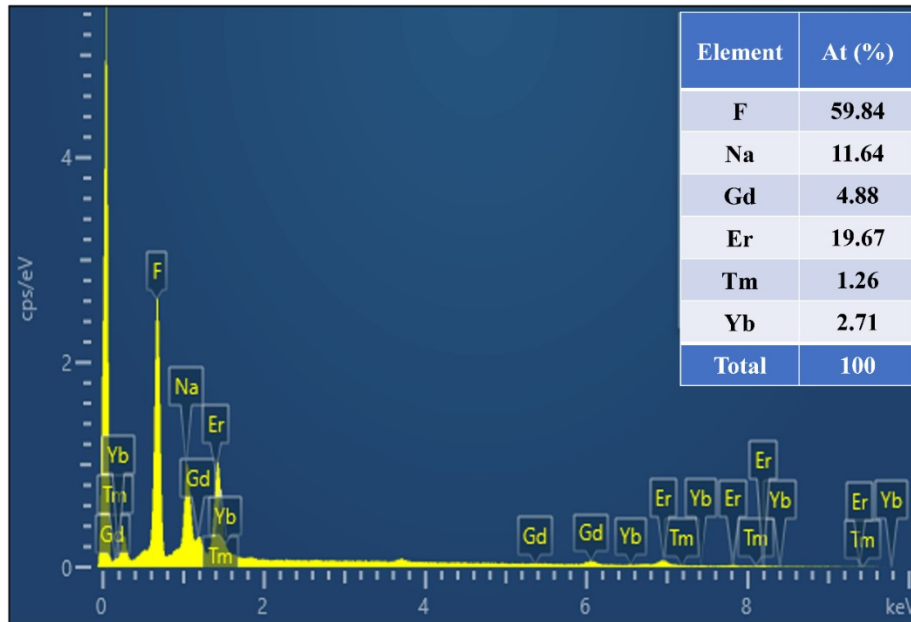

26

27 **Fig. S1** Element distribution of NaErF<sub>4</sub>:0.5%Tm@NaGdF<sub>4</sub>:40%Yb UCNP

28

29

30

31

32

33

34

35

36

37

38

39

40

41 The infrared spectrums of the prepared nanomaterials (**Fig. S2**) show the -OH

42 stretching vibration peak of the OA molecule corresponding to  $3432\text{ cm}^{-1}$ , the -CH<sub>2</sub>

43 stretching vibration peak of the OA molecule corresponding to  $2927$  and  $2858\text{ cm}^{-1}$ ,

44 and the -COO stretching vibration peak corresponding to  $1564$  and  $1463\text{ cm}^{-1}$  become

45 weak or even disappear. These indicate that most of the OA molecules attached to the

46 surface of UCNPs have been removed.

47

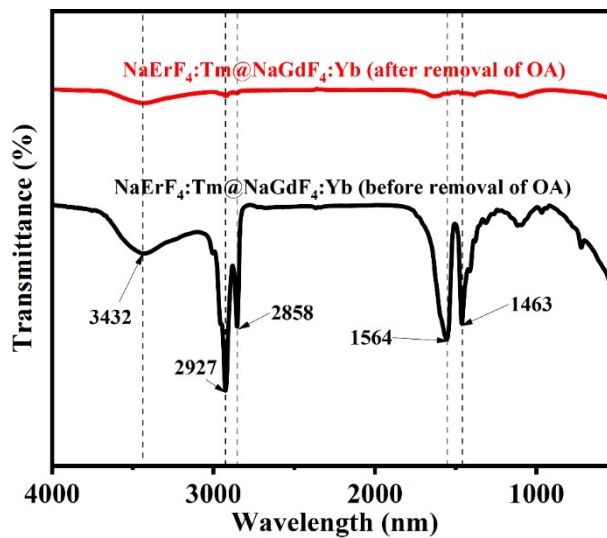

48

49

**Fig. S2** The infrared spectrums of the prepared UCNPs

50
